# Supplementary material for: Reference Gene Selection for Quantitative Real-time PCR Normalization in Caragana intermedia under Different Abiotic Stress Conditions
Source: PubMed Central journal article supplement (PMC3534648; doi:10.1371/journal.pone.0053196), 2013-01-02

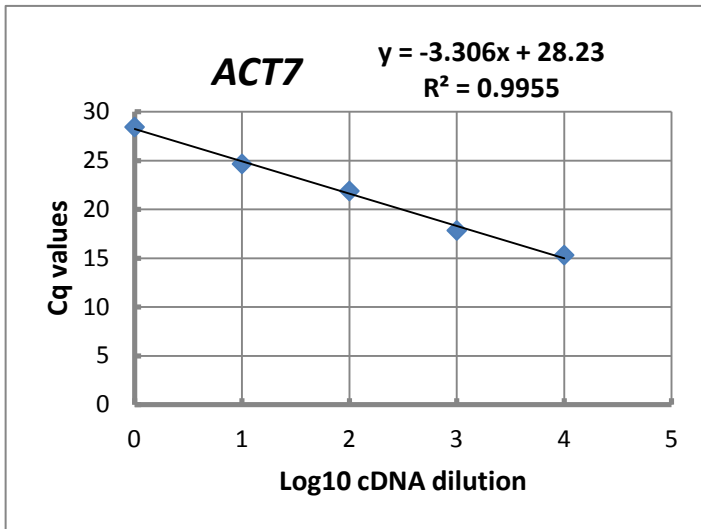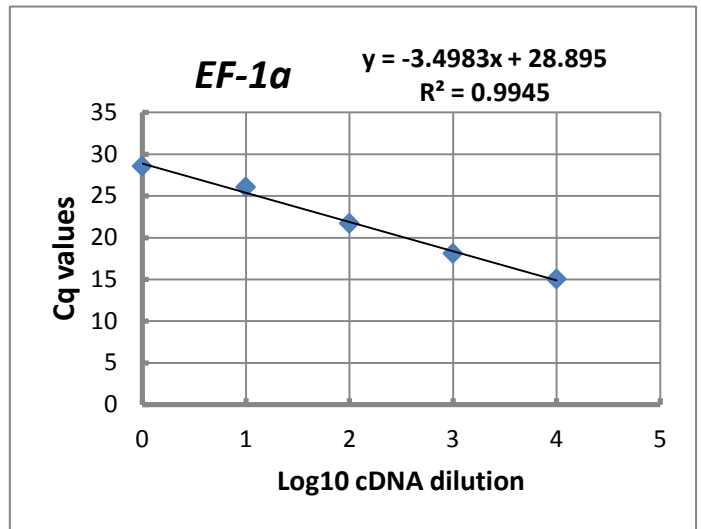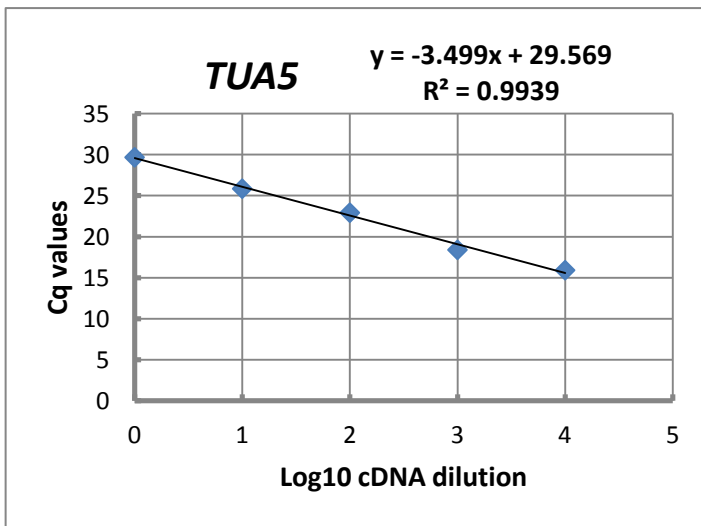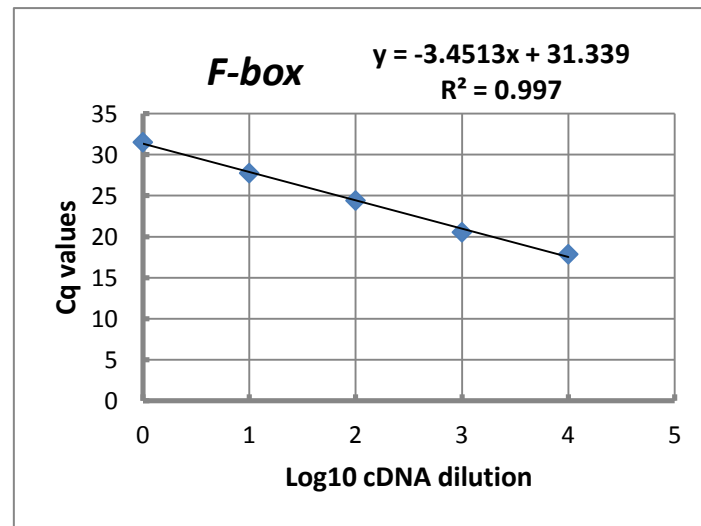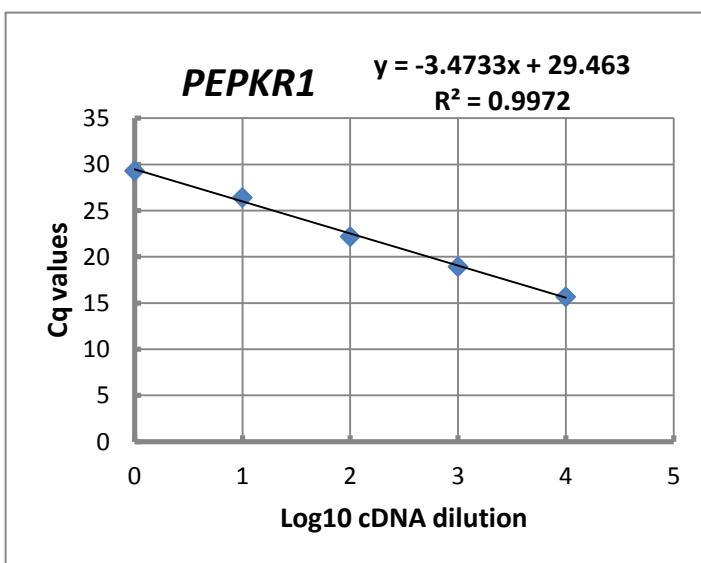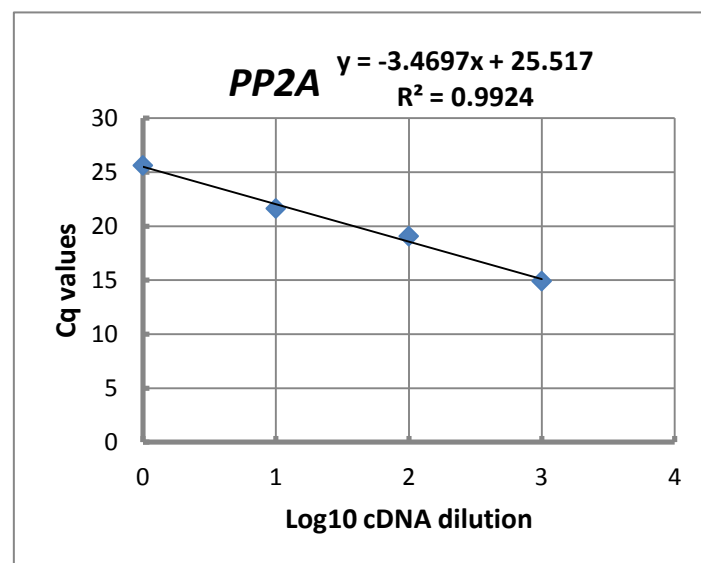

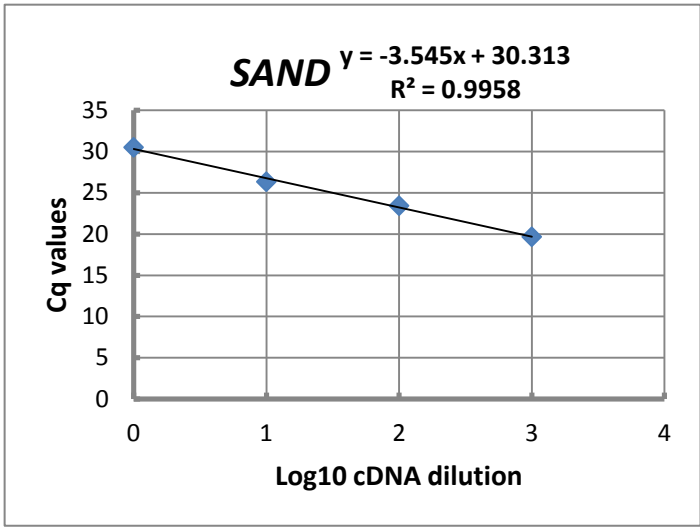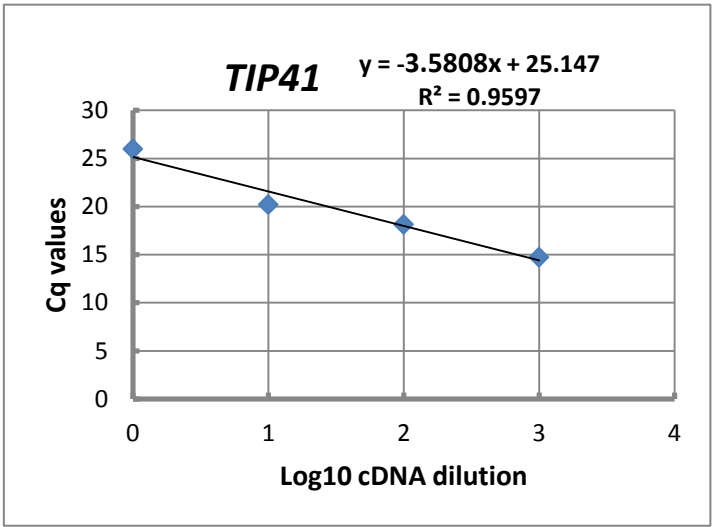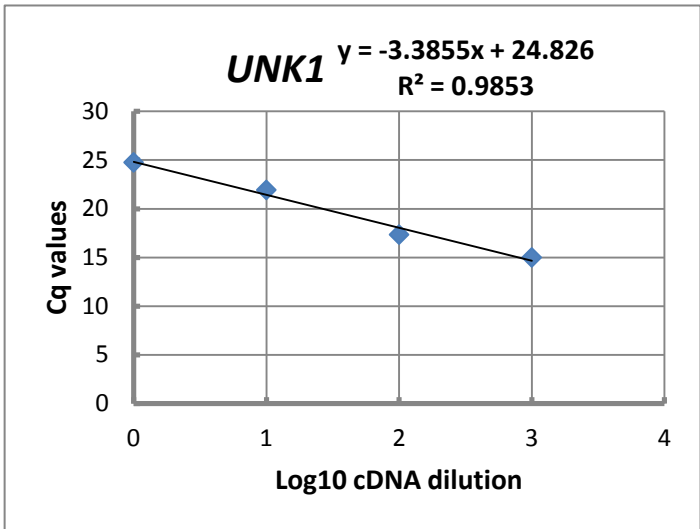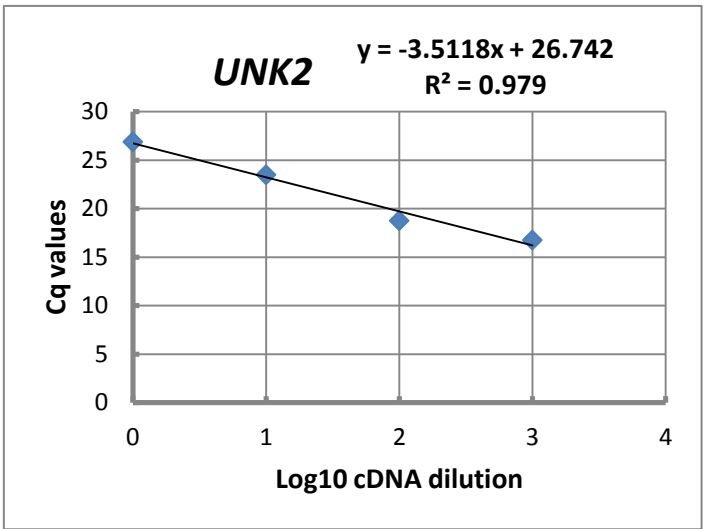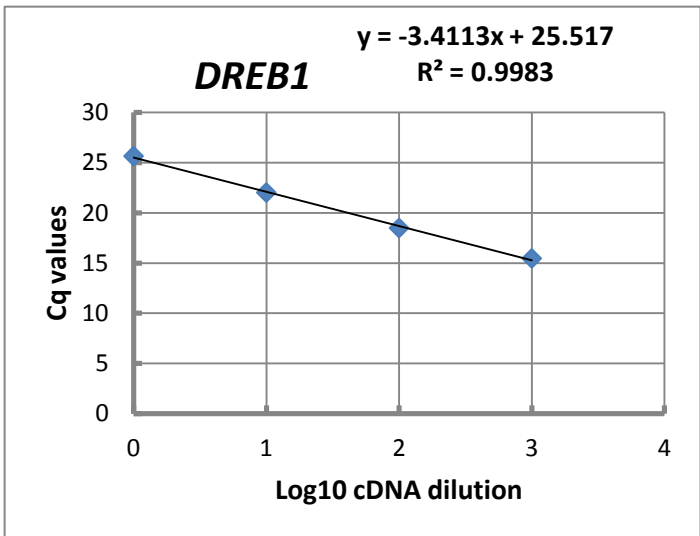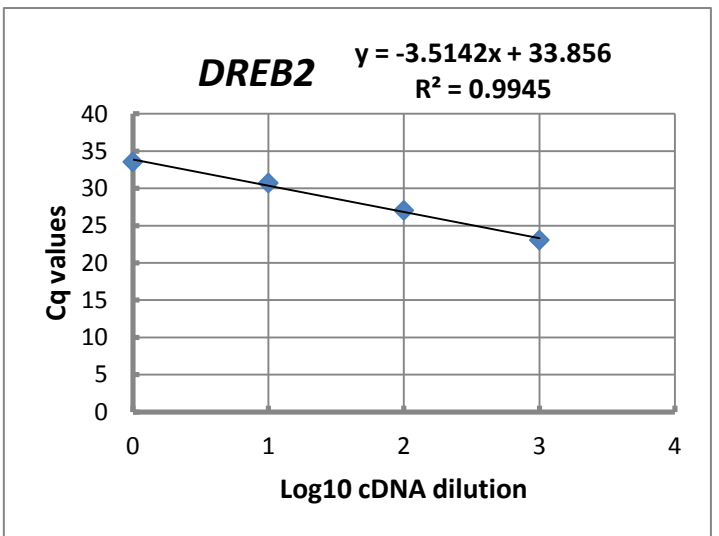

Supplement: pone.0053196.s002.pdf [file pone.0053196.s002.pdf]
